# Supplementary material for: Exploration of bacterial lipopolysaccharide-related genes signature based on T cells for predicting prognosis in colorectal cancer
Source: publisher site journal article supplement (doi:10.18632/aging.206041), 2024-08-06
Supplement: Supplementary file [file aging-v16i15-206041-supplementary-material-SD1.pdf]

# SUPPLEMENTARY FIGURES

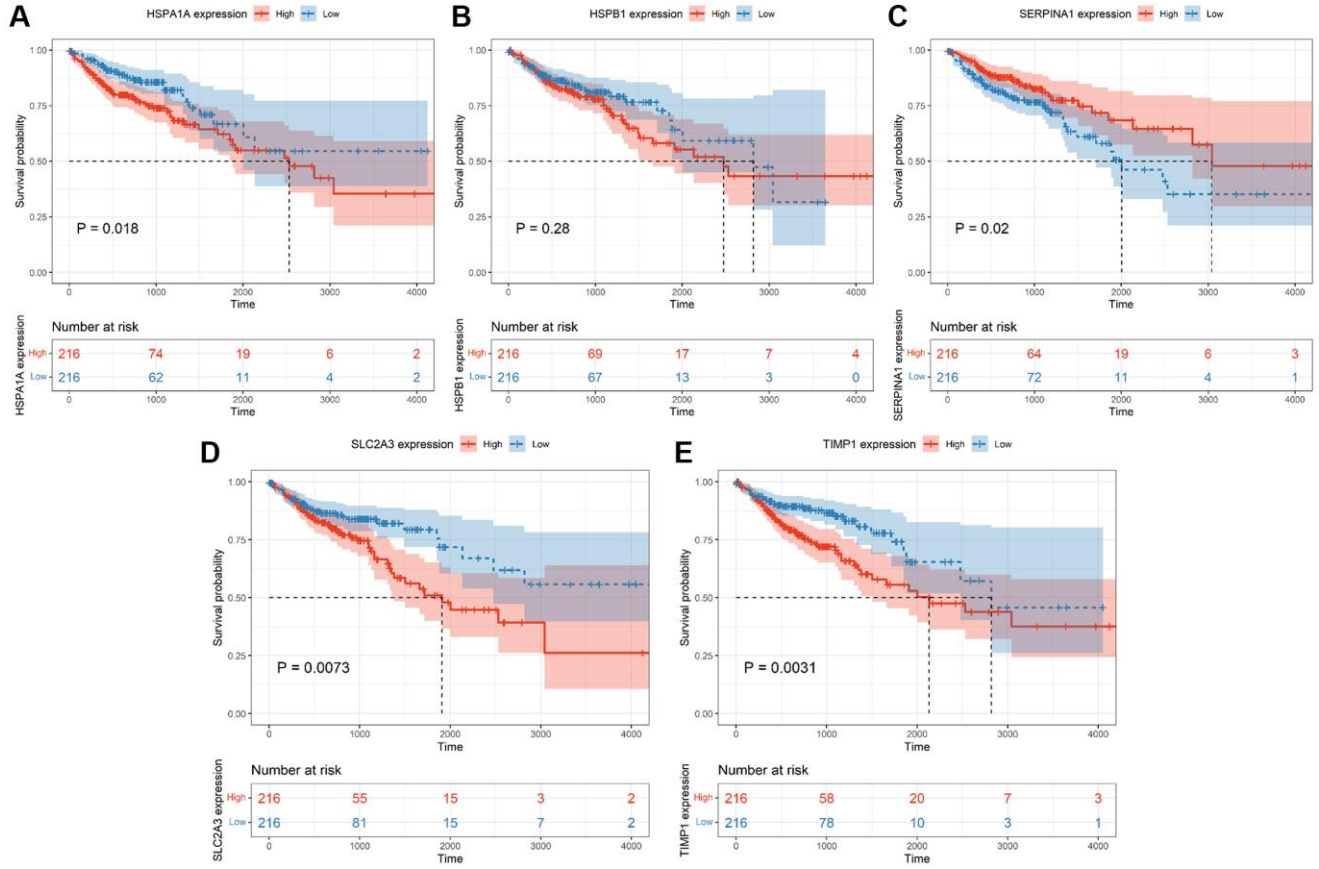

**Supplementary Figure 1.** Kaplan–Meier analysis of each TALRG mRNA expression, including HSPA1A, HSPB1, SERPINA1, SLC2A3, and TIMP1 (A–E).

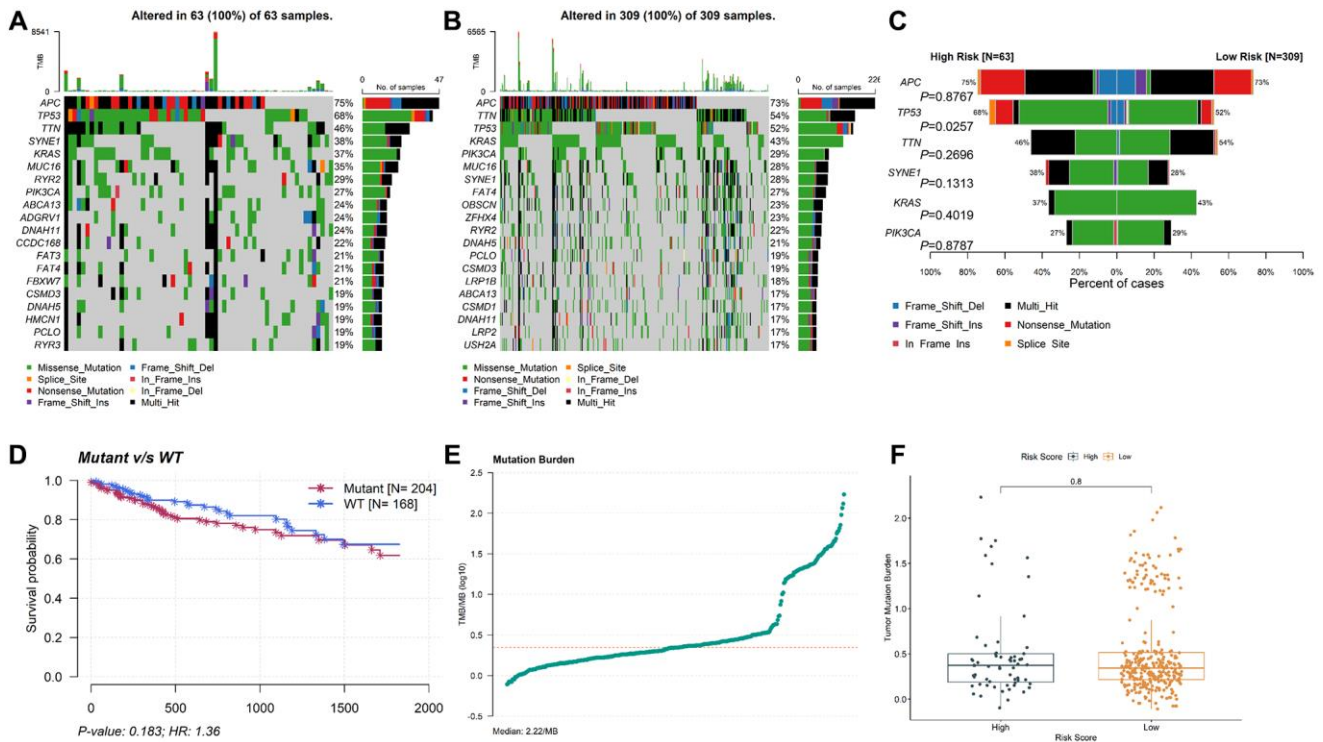

**Supplementary Figure 2. Differences in mutation profiles between high- and low-risk groups.** Waterfall plot of the top 20 mutated genes in high- (A) and low-risk groups (B). (C) Comparison of the mutation rate between the high- and low-risk groups. (D) Kaplan-Meier analysis of TP53 mutation status. (E) The TMB profiles of CRC patients. (F) Comparison of TMB values between the high- and low-risk groups.
