# Supplementary material for: Exploration of bacterial lipopolysaccharide-related genes signature based on T cells for predicting prognosis in colorectal cancer
Source: publisher site journal article supplement (doi:10.18632/aging.206041), 2024-08-06
Supplement: Supplementary file [file aging-v16i15-206041-supplementary-material-SD2.pdf]

## SUPPLEMENTARY TABLES

Supplementary Table 1. The detailed information of TCGA-COAD cohort.

|                                       | Tumor<br>(N = 432) | Normal<br>(N = 39) | Overall<br>(N = 471) |
|---------------------------------------|--------------------|--------------------|----------------------|
| <b>Factor (Gender)</b>                |                    |                    |                      |
| Female                                | 200 (46.3%)        | 20 (51.3%)         | 220 (46.7%)          |
| Male                                  | 232 (53.7%)        | 19 (48.7%)         | 251 (53.3%)          |
| <b>Factor (Age)</b>                   |                    |                    |                      |
| ≤60                                   | 136 (31.5%)        | 9 (23.1%)          | 145 (30.8%)          |
| >60                                   | 296 (68.5%)        | 30 (76.9%)         | 326 (69.2%)          |
| <b>Factor (microsatellite_status)</b> |                    |                    |                      |
| Indeterminate                         | 8 (1.9%)           | 3 (7.7%)           | 11 (2.3%)            |
| MSI-H                                 | 3 (0.7%)           | 0 (0%)             | 3 (0.6%)             |
| MSI-L                                 | 72 (16.7%)         | 9 (23.1%)          | 81 (17.2%)           |
| MSS                                   | 72 (16.7%)         | 6 (15.4%)          | 78 (16.6%)           |
| MSS                                   | 277 (64.1%)        | 21 (53.8%)         | 298 (63.3%)          |
| <b>Factor (Stage)</b>                 |                    |                    |                      |
| I                                     | 73 (16.9%)         | 4 (10.3%)          | 77 (16.3%)           |
| II                                    | 166 (38.4%)        | 21 (53.8%)         | 187 (39.7%)          |
| III                                   | 122 (28.2%)        | 6 (15.4%)          | 128 (27.2%)          |
| IV                                    | 60 (13.9%)         | 7 (17.9%)          | 67 (14.2%)           |
| Missing                               | 11 (2.5%)          | 1 (2.6%)           | 12 (2.5%)            |
| <b>Factor (T)</b>                     |                    |                    |                      |
| T1                                    | 11 (2.5%)          | 0 (0%)             | 11 (2.3%)            |
| T2                                    | 75 (17.4%)         | 5 (12.8%)          | 80 (17.0%)           |
| T3                                    | 296 (68.5%)        | 28 (71.8%)         | 324 (68.8%)          |
| T4                                    | 49 (11.3%)         | 6 (15.4%)          | 55 (11.7%)           |
| Missing                               | 1 (0.2%)           | 0 (0%)             | 1 (0.2%)             |
| <b>Factor (M)</b>                     |                    |                    |                      |
| M0                                    | 318 (73.6%)        | 25 (64.1%)         | 343 (72.8%)          |
| M1                                    | 60 (13.9%)         | 7 (17.9%)          | 67 (14.2%)           |
| MX                                    | 47 (10.9%)         | 6 (15.4%)          | 53 (11.3%)           |
| Missing                               | 7 (1.6%)           | 1 (2.6%)           | 8 (1.7%)             |
| <b>Factor (N)</b>                     |                    |                    |                      |
| N0                                    | 254 (58.8%)        | 27 (69.2%)         | 281 (59.7%)          |
| N1                                    | 100 (23.1%)        | 7 (17.9%)          | 107 (22.7%)          |
| N2                                    | 78 (18.1%)         | 5 (12.8%)          | 83 (17.6%)           |

**Supplementary Table 2. The detailed information of GSE39582 cohort.**

|                         | Alive<br>(N = 369) | Death<br>(N = 187) | Overall<br>(N = 556) |
|-------------------------|--------------------|--------------------|----------------------|
| <b>Factor (Sex)</b>     |                    |                    |                      |
| Female                  | 175 (47.4%)        | 74 (39.6%)         | 249 (44.8%)          |
| Male                    | 194 (52.6%)        | 113 (60.4%)        | 307 (55.2%)          |
| <b>Factor (Age)</b>     |                    |                    |                      |
| ≤60                     | 115 (31.2%)        | 42 (22.5%)         | 157 (28.2%)          |
| >60                     | 254 (68.8%)        | 145 (77.5%)        | 399 (71.8%)          |
| <b>Factor (Stage)</b>   |                    |                    |                      |
| 0                       | 3 (0.8%)           | 1 (0.5%)           | 4 (0.7%)             |
| 1                       | 27 (7.3%)          | 5 (2.7%)           | 32 (5.8%)            |
| 2                       | 183 (49.6%)        | 75 (40.1%)         | 258 (46.4%)          |
| 3                       | 136 (36.9%)        | 67 (35.8%)         | 203 (36.5%)          |
| 4                       | 20 (5.4%)          | 39 (20.9%)         | 59 (10.6%)           |
| <b>Factor (T_stage)</b> |                    |                    |                      |
| N/A                     | 8 (2.2%)           | 12 (6.4%)          | 20 (3.6%)            |
| T0                      | 1 (0.3%)           | 0 (0%)             | 1 (0.2%)             |
| T1                      | 10 (2.7%)          | 1 (0.5%)           | 11 (2.0%)            |
| T2                      | 36 (9.8%)          | 8 (4.3%)           | 44 (7.9%)            |
| T3                      | 249 (67.5%)        | 111 (59.4%)        | 360 (64.7%)          |
| T4                      | 63 (17.1%)         | 54 (28.9%)         | 117 (21.0%)          |
| Tis                     | 2 (0.5%)           | 1 (0.5%)           | 3 (0.5%)             |
| <b>Factor (M_stage)</b> |                    |                    |                      |
| M0                      | 340 (92.1%)        | 134 (71.7%)        | 474 (85.3%)          |
| M1                      | 20 (5.4%)          | 40 (21.4%)         | 60 (10.8%)           |
| MX                      | 1 (0.3%)           | 1 (0.5%)           | 2 (0.4%)             |
| N/A                     | 8 (2.2%)           | 12 (6.4%)          | 20 (3.6%)            |
| <b>Factor (N_stage)</b> |                    |                    |                      |
| N/A                     | 8 (2.2%)           | 12 (6.4%)          | 20 (3.6%)            |
| N+                      | 1 (0.3%)           | 5 (2.7%)           | 6 (1.1%)             |
| N0                      | 214 (58.0%)        | 81 (43.3%)         | 295 (53.1%)          |
| N1                      | 91 (24.7%)         | 40 (21.4%)         | 131 (23.6%)          |
| N2                      | 52 (14.1%)         | 46 (24.6%)         | 98 (17.6%)           |
| N3                      | 3 (0.8%)           | 3 (1.6%)           | 6 (1.1%)             |

**Supplementary Table 3. Gene set from T cells comparison between the tumor and normal cells.**

| <b>gene-ID</b> | <b>myAUC</b> | <b>avg_diff</b> | <b>power</b> | <b>avg_log2FC</b> | <b>pct.1</b> | <b>pct.2</b> |
|----------------|--------------|-----------------|--------------|-------------------|--------------|--------------|
| JUNB           | 0.676        | 0.540385        | 0.352        | 0.779611          | 0.907        | 0.703        |
| NR4A2          | 0.668        | 0.69728         | 0.336        | 1.005962          | 0.667        | 0.377        |
| CD55           | 0.649        | 0.61498         | 0.298        | 0.887228          | 0.628        | 0.38         |
| RPS26          | 0.352        | -0.52224        | 0.296        | -0.75344          | 0.897        | 0.929        |
| CXCR4          | 0.641        | 0.455137        | 0.282        | 0.656624          | 0.767        | 0.547        |
| BTG1           | 0.634        | 0.440019        | 0.268        | 0.634813          | 0.927        | 0.81         |
| YPEL5          | 0.633        | 0.546502        | 0.266        | 0.788435          | 0.624        | 0.41         |
| ZNF331         | 0.629        | 0.595867        | 0.258        | 0.859654          | 0.502        | 0.26         |
| NR4A1          | 0.629        | 0.479171        | 0.258        | 0.691298          | 0.652        | 0.421        |
| EZR            | 0.626        | 0.488399        | 0.252        | 0.704611          | 0.681        | 0.5          |
| HERPUD1        | 0.624        | 0.425807        | 0.248        | 0.61431           | 0.764        | 0.606        |
| S100A11        | 0.378        | -1.0229         | 0.244        | -1.47574          | 0.336        | 0.517        |
| CD37           | 0.621        | 0.425842        | 0.242        | 0.614361          | 0.748        | 0.574        |
| CD83           | 0.62         | 0.761335        | 0.24         | 1.098374          | 0.464        | 0.245        |
| GTF2B          | 0.619        | 0.471917        | 0.238        | 0.680832          | 0.505        | 0.294        |
| S100A6         | 0.381        | -0.94463        | 0.238        | -1.36281          | 0.477        | 0.639        |
| LAPTM5         | 0.616        | 0.406139        | 0.232        | 0.585935          | 0.77         | 0.595        |
| CD79A          | 0.615        | 0.698526        | 0.23         | 1.007759          | 0.5          | 0.315        |
| CREM           | 0.613        | 0.5707          | 0.226        | 0.823346          | 0.492        | 0.29         |
| SLC2A3         | 0.611        | 0.483525        | 0.222        | 0.697579          | 0.526        | 0.328        |
| CD74           | 0.611        | 0.626941        | 0.222        | 0.904485          | 0.873        | 0.806        |
| HLA-DPA1       | 0.606        | 0.488038        | 0.212        | 0.70409           | 0.591        | 0.424        |
| HLA-DRB5       | 0.605        | 0.599606        | 0.21         | 0.865048          | 0.434        | 0.245        |
| RHOH           | 0.605        | 0.479818        | 0.21         | 0.692231          | 0.51         | 0.329        |
| HLA-DRB1       | 0.603        | 0.481777        | 0.206        | 0.695057          | 0.563        | 0.39         |
| HIST1H4C       | 0.603        | 0.423851        | 0.206        | 0.611488          | 0.656        | 0.508        |
| HLA-DRA        | 0.602        | 0.619545        | 0.204        | 0.893814          | 0.492        | 0.328        |
| HLA-DQB1       | 0.601        | 0.527498        | 0.202        | 0.761018          | 0.455        | 0.27         |
| HLA-DQA1       | 0.598        | 0.537681        | 0.196        | 0.77571           | 0.419        | 0.235        |
| RBM38          | 0.593        | 0.439431        | 0.186        | 0.633965          | 0.291        | 0.108        |
| LY9            | 0.593        | 0.524742        | 0.186        | 0.757042          | 0.347        | 0.17         |
| PPDPF          | 0.411        | -0.55898        | 0.178        | -0.80644          | 0.786        | 0.829        |
| CHMP1B         | 0.589        | 0.584106        | 0.178        | 0.842686          | 0.335        | 0.167        |
| TCL1A          | 0.589        | 0.709733        | 0.178        | 1.023929          | 0.244        | 0.064        |
| LGALS3         | 0.412        | -0.82682        | 0.176        | -1.19285          | 0.214        | 0.373        |
| VPS37B         | 0.586        | 0.442933        | 0.172        | 0.639018          | 0.345        | 0.188        |
| VPREB3         | 0.582        | 0.424238        | 0.164        | 0.612047          | 0.303        | 0.138        |
| HSPB1          | 0.419        | -0.55165        | 0.162        | -0.79586          | 0.294        | 0.426        |
| CSTB           | 0.422        | -0.53586        | 0.156        | -0.77308          | 0.338        | 0.465        |
| NR4A3          | 0.578        | 0.413409        | 0.156        | 0.596423          | 0.264        | 0.111        |
| GPR18          | 0.575        | 0.489747        | 0.15         | 0.706556          | 0.209        | 0.059        |
| S100A4         | 0.426        | -0.56929        | 0.148        | -0.82132          | 0.357        | 0.473        |
| HLA-DQA2       | 0.574        | 0.519909        | 0.148        | 0.75007           | 0.254        | 0.109        |

|          |       |          |       |          |       |       |
|----------|-------|----------|-------|----------|-------|-------|
| ANXA2    | 0.427 | -0.61898 | 0.146 | -0.893   | 0.189 | 0.321 |
| TXN      | 0.428 | -0.54125 | 0.144 | -0.78085 | 0.3   | 0.418 |
| S100A10  | 0.429 | -0.76431 | 0.142 | -1.10267 | 0.495 | 0.58  |
| CST3     | 0.437 | -0.83373 | 0.126 | -1.20281 | 0.078 | 0.199 |
| SELENOW  | 0.438 | -0.40586 | 0.124 | -0.58553 | 0.301 | 0.408 |
| GSTP1    | 0.44  | -0.4488  | 0.12  | -0.64748 | 0.471 | 0.534 |
| FCER2    | 0.559 | 0.41153  | 0.118 | 0.593712 | 0.179 | 0.062 |
| TIMP1    | 0.442 | -0.935   | 0.116 | -1.34892 | 0.136 | 0.245 |
| IGHM     | 0.552 | 0.506522 | 0.104 | 0.730756 | 0.192 | 0.089 |
| LYZ      | 0.448 | -1.18492 | 0.104 | -1.70948 | 0.011 | 0.116 |
| RAC1     | 0.448 | -0.43494 | 0.104 | -0.62748 | 0.31  | 0.384 |
| GPX2     | 0.452 | -0.82268 | 0.096 | -1.18688 | 0.037 | 0.131 |
| IFI27    | 0.455 | -0.65298 | 0.09  | -0.94206 | 0.055 | 0.144 |
| CEBPD    | 0.455 | -0.4333  | 0.09  | -0.62512 | 0.099 | 0.188 |
| HSPA6    | 0.455 | -0.87952 | 0.09  | -1.26888 | 0.054 | 0.142 |
| KRT19    | 0.457 | -0.82736 | 0.086 | -1.19363 | 0.051 | 0.136 |
| KRT18    | 0.457 | -0.74114 | 0.086 | -1.06924 | 0.104 | 0.186 |
| LGALS1   | 0.458 | -0.45727 | 0.084 | -0.6597  | 0.248 | 0.318 |
| KRT8     | 0.459 | -0.62666 | 0.082 | -0.90407 | 0.079 | 0.161 |
| PHLDA2   | 0.459 | -0.60937 | 0.082 | -0.87913 | 0.06  | 0.139 |
| MDK      | 0.461 | -0.54889 | 0.078 | -0.79189 | 0.036 | 0.112 |
| HSPA1A   | 0.462 | -0.59295 | 0.076 | -0.85545 | 0.437 | 0.471 |
| EPCAM    | 0.462 | -0.5093  | 0.076 | -0.73477 | 0.051 | 0.126 |
| CTSB     | 0.463 | -0.5349  | 0.074 | -0.7717  | 0.177 | 0.245 |
| CEACAM5  | 0.464 | -0.66325 | 0.072 | -0.95687 | 0.033 | 0.103 |
| PERP     | 0.464 | -0.43449 | 0.072 | -0.62684 | 0.113 | 0.179 |
| TSPAN8   | 0.465 | -0.51586 | 0.07  | -0.74423 | 0.038 | 0.109 |
| CLDN3    | 0.465 | -0.41945 | 0.07  | -0.60514 | 0.068 | 0.139 |
| IFITM3   | 0.466 | -0.43279 | 0.068 | -0.62439 | 0.244 | 0.293 |
| HSPA1B   | 0.466 | -0.47407 | 0.068 | -0.68394 | 0.476 | 0.498 |
| SERPINA1 | 0.467 | -0.54867 | 0.066 | -0.79156 | 0.037 | 0.103 |
| S100A14  | 0.468 | -0.41836 | 0.064 | -0.60356 | 0.037 | 0.1   |
| PIGR     | 0.473 | -0.44955 | 0.054 | -0.64857 | 0.057 | 0.11  |
| IGHA1    | 0.481 | -0.62369 | 0.038 | -0.89979 | 0.197 | 0.228 |
| GZMB     | 0.482 | -0.45741 | 0.036 | -0.65991 | 0.147 | 0.177 |
| IGKC     | 0.483 | -0.63964 | 0.034 | -0.92281 | 0.236 | 0.262 |
| MZB1     | 0.494 | -0.44485 | 0.012 | -0.64178 | 0.186 | 0.185 |
| IGLL5    | 0.496 | -0.46485 | 0.008 | -0.67064 | 0.121 | 0.126 |
| IGKV3-20 | 0.497 | -0.42117 | 0.006 | -0.60762 | 0.117 | 0.124 |
